# Supplementary material for: Study quality on groin injury management remains low: a systematic review on treatment of groin pain in athletes
Source: PubMed Central journal article supplement — Br J Sports Med. 2015 Jan 29;49(12):813. doi: 10.1136/bjsports-2014-094256 (PMC4484372; doi:10.1136/bjsports-2014-094256), 2015-01-29
Supplement: bjsports-2014-094256-s2.pdf [file bjsports-2014-094256-s2.pdf]

**Supplementary table 2** - Quality Assessment Tool: Modified Downs and Black scale

| <b>Reporting</b>                                                                                                                              | <b>YES<br/>(published)</b> | <b>No /<br/>Unable to<br/>Determine</b> |
|-----------------------------------------------------------------------------------------------------------------------------------------------|----------------------------|-----------------------------------------|
| 1) Is the hypothesis/aim/objective of the study clearly described?                                                                            |                            |                                         |
| 2) Are the main outcomes to be measured clearly described in the Introduction or Methods section?                                             |                            |                                         |
| 3) Are the characteristics of the patients included in the study clearly described ?                                                          |                            |                                         |
| 4) Are the interventions of interest clearly described?                                                                                       |                            |                                         |
| 5) Are the distributions of principal confounders in each group of subjects to be compared clearly described?                                 |                            |                                         |
| 6) Are the main findings of the study clearly described?                                                                                      |                            |                                         |
| 7) Does the study provide estimates of the random variability in the data for the main outcomes?                                              |                            |                                         |
| 8) Have all important adverse events that may be a consequence of the intervention been reported?                                             |                            |                                         |
| 9) Have the characteristics of patients lost to follow-up been described?                                                                     |                            |                                         |
| 10) Have actual probability values been reported?                                                                                             |                            |                                         |
| <b>External validity</b>                                                                                                                      |                            |                                         |
| 11) Were the subjects asked to participate in the study representative of the entire population from which they were recruited?               |                            |                                         |
| 12) Were those subjects who were prepared to participate representative of the entire population from which they were recruited?              |                            |                                         |
| 13) Were the staff, places, and facilities where the patients were treated, representative of the treatment the majority of patients receive? |                            |                                         |
| <b>Internal validity - Bias</b>                                                                                                               |                            |                                         |
| 14) Was an attempt made to blind study subjects to the                                                                                        |                            |                                         |

|                                                                                                                                                   |  |  |
|---------------------------------------------------------------------------------------------------------------------------------------------------|--|--|
| intervention they have received?                                                                                                                  |  |  |
| 15) Was an attempt made to blind those measuring the main outcomes of the intervention?                                                           |  |  |
| 16) If any of the results of the study were based on “data dredging”, was this made clear?                                                        |  |  |
| 17) In trials and cohort studies, do the analyses adjust for different lengths of follow-up of patients?                                          |  |  |
| 18) Were the statistical tests used to assess the main outcomes appropriate?                                                                      |  |  |
| 19) Was compliance with the interventions reliable?                                                                                               |  |  |
| 20) Were the main outcome measures used accurate (valid and reliable)?                                                                            |  |  |
| <b>Internal validity – Confounding (selection bias)</b>                                                                                           |  |  |
| 21) Were the patients in different intervention groups (trials and cohort studies) recruited from the same population?                            |  |  |
| 22) Were study subjects in different intervention groups (trials and cohort studies) recruited over the same period of time?                      |  |  |
| 23) Were study subjects randomised to intervention groups?                                                                                        |  |  |
| 24) Was the randomised intervention assignment concealed from both patients and health care staff until recruitment was complete and irrevocable? |  |  |
| 25) Was there adequate adjustment for confounding in the analyses from which the main findings were drawn?                                        |  |  |
| 26) Were losses of patients to follow-up taken into account?                                                                                      |  |  |
| 27) Did the study have sufficient power to detect a clinically important effect?                                                                  |  |  |
