# Supplementary material for: Study quality on groin injury management remains low: a systematic review on treatment of groin pain in athletes
Source: PubMed Central journal article supplement — Br J Sports Med. 2015 Jan 29;49(12):813. doi: 10.1136/bjsports-2014-094256 (PMC4484372; doi:10.1136/bjsports-2014-094256), 2015-01-29
Supplement: bjsports-2014-094256-s3.pdf [file bjsports-2014-094256-s3.pdf]

**Supplementary table 3** - Data extraction of the included articles listed according to diagnostic category

**Inguinal-related**

| Ref                           | Study type | N  | Mean Age (year) | Type of Sports | Diagnosis              | Mean Duration symptoms (months) | Intervention treatment group                                                            | Intervention control group(s)                   | Mean follow-up (months) | Treatment success (%) | Athletes RTP (%)     | D&B Quality score (points) |
|-------------------------------|------------|----|-----------------|----------------|------------------------|---------------------------------|-----------------------------------------------------------------------------------------|-------------------------------------------------|-------------------------|-----------------------|----------------------|----------------------------|
| Comin et al. (2013)           | RCT        | 36 | 43.2            | Football       | Sportman's hernia      | 9.1                             | Radiofrequency denervation of the ilioinguinal nerve and inguinal ligament (RF)         | Corticosteroid injection inguinal ligament (CI) | 6                       | RF: 77% †<br>CI: 8%   | RF: NL<br>CI: NL     | 18                         |
| Muscha weck and Berger (2010) | PCS        | 87 | 29              | NL             | Sportman's hernia      | 3                               | Surgical open hernia repair with or without partial removal of the genito-femoral nerve | NA                                              | 1                       | 79%                   | 84%                  | 16                         |
| Canonico et al. (2007)        | PCS        | 16 | 19              | Football       | Chronic inguinal pain  | NL                              | Surgical open hernia repair                                                             | NA                                              | 12                      | 100%                  | 100%                 | 14                         |
| Economopoulos et al. (2013)   | CCT        | 28 | 23.5            | NL             | Sportman's hernia      | NL                              | Surgical open hernia repair (HR)                                                        | Surgical minimal repair technique (MR)          | 41                      | HR: 93% ¥<br>MR: 78%  | HR: 93% †<br>MR: 64% | 14                         |
| Malycha and Lovell (1992)     | RCS        | 44 | 25.4            | Football       | Sportman's hernia      | 9                               | Surgical open hernia repair                                                             | NA                                              | 6                       | 98%                   | 93%                  | 13                         |
| Kumar et al. (2002)           | RCS        | 25 | 30              | Football       | Sportman's hernia      | NL                              | Surgical external oblique repair and hernia repair                                      | NA                                              | 6                       | 82%                   | 93%                  | 12                         |
| Van Veen et al. (2007)        | PCS        | 55 | 25              | Football       | Sportman's hernia      | NL                              | Surgical laparoscopic hernia repair                                                     | NA                                              | 3                       | 88%                   | 88%                  | 12                         |
| Brannigan et al. (2000)       | RCS        | 85 | 24              | Irish football | Gilmore's groin hernia | 13.6                            | Surgical open hernia repair                                                             | NA                                              | NL                      | 96%                   | 96%                  | 11                         |
| Irshad et al. (2001)          | RCS        | 22 | 26              | Ice hockey     | Hockey groin syndrome  | 6                               | Surgical external oblique repair with neurotomy of the ilioinguinal nerve               | NA                                              | 31.2                    | 82%                   | 100%                 | 11                         |
| Paajanen et al. (2004)        | RCS        | 41 | 27              | Football       | Sportman's hernia      | 9.2                             | Surgical laparoscopic hernia repair                                                     | NA                                              | 51                      | 95%                   | 95%                  | 10                         |
| Lloyd et                      | RCS        | 28 | 38.5            | NL             | Inguinal               | 18                              | Surgical laparoscopic                                                                   | NA                                              | 6                       | 57%                   | 92%                  | 10                         |

|                                 |     |     |      |                                  |                                                                    |      |                                                                                                   |                                                                                          |      |                                               |      |   |
|---------------------------------|-----|-----|------|----------------------------------|--------------------------------------------------------------------|------|---------------------------------------------------------------------------------------------------|------------------------------------------------------------------------------------------|------|-----------------------------------------------|------|---|
| al. (2008)                      |     |     |      |                                  | ligament pathology                                                 |      | inguinal ligament tenotomy                                                                        |                                                                                          |      |                                               |      |   |
| Ingoldby (1997)                 | RCS | 28  | NL   | Rugby                            | Inguinal canal-related pain                                        | NL   | Surgical open hernia repair                                                                       | NA                                                                                       | NL   | 100%                                          | 100% | 9 |
| Ekstrand and Ringborg (2001)    | RCT | 66  | 25   | Football                         | Chronic groin pain due to incipient hernia and/or nerve entrapment | 13   | Surgical open hernia repair with neurectomy of the ilio-inguinal and ilio-hypogastric nerves (OR) | (1) Standard physical therapy (PT), (2) Exercise therapy (ET), and (3) Wait and see (WS) | 6    | OR: 94% +<br>(PT) 19%<br>(ET) 39%<br>(WS) 27% | NL   | 9 |
| Srinivasan and Schuricht (2002) | RCS | 15  | 27.1 | Football                         | Sportman's hernia                                                  | 11.1 | Surgical laparoscopic hernia repair                                                               | NA                                                                                       | 12.1 | 100%                                          | 87%  | 9 |
| Bernhardt et al. (2014)         | PCS | 28  | 29   | Football                         | Sportman's hernia                                                  | NL   | Surgical laparoscopic hernia repair                                                               | NA                                                                                       | 94   | 88%                                           | NL   | 9 |
| Evans (1998)                    | RCS | 154 | 24.1 | Football                         | Sportman's hernia                                                  | NL   | Surgical laparoscopic hernia repair                                                               | NA                                                                                       | NL   | 99%                                           | 93%  | 8 |
| Edelman and Selesnick (2006)    | RCS | 10  | 31.9 | Football and Basketball          | Sportman's hernia                                                  | NL   | Surgical laparoscopic hernia repair                                                               | NA                                                                                       | 12   | 80%                                           | NL   | 8 |
| Jakoi et al. (2013)             | RCS | 43  | NL   | Ice Hockey                       | Sportman's hernia                                                  | NL   | Surgical treatment (not specified)                                                                | NA                                                                                       | 24   | 27%                                           | 80%  | 8 |
| Smedberg et al. (1985)          | RCS | 53  | 29.1 | Football                         | Athletic groin hernia                                              | 10   | Surgical open hernia repair                                                                       | NA                                                                                       | 41   | 90%                                           | 98%  | 7 |
| Lacroix et al. (1998)           | RCS | 11  | NL   | Ice hockey                       | Lower abdominal pain syndrome                                      | NL   | Surgical external oblique repair with neurectomy of the ilio-inguinal nerve                       | NA                                                                                       | NL   | 91%                                           | 91%  | 7 |
| Ziprin et al. (2008)            | RCS | 17  | 27   | NL                               | Sportman's hernia                                                  | 6    | Surgical laparoscopic hernia repair                                                               | NA                                                                                       | 6    | 94%                                           | 94%  | 7 |
| Messaoudi et al. (2012)         | RCS | 71  | 24   | Football                         | Sportman's hernia                                                  | 11   | Surgical open hernia repair with bilateral percutaneous adductor release                          | NA                                                                                       | 48   | 100%                                          | 94%  | 7 |
| Steele et al. (2004)            | RCS | 47  | NL   | Football and Australian football | Posterior inguinal wall deficiency                                 | 8    | Surgical open hernia repair                                                                       | NA                                                                                       | NL   | 81%                                           | 77%  | 6 |

|                           |     |     |      |                    |                   |     |                                                                                                   |    |      |      |      |   |
|---------------------------|-----|-----|------|--------------------|-------------------|-----|---------------------------------------------------------------------------------------------------|----|------|------|------|---|
| Ahumad a et al. (2005)    | RCS | 12  | 25   | Running            | Sportman's hernia | 9   | Surgical open hernia repair with or without adductor release                                      | NA | 4    | 100% | 100% | 6 |
| Diaco et al. (2005)       | RCS | 96  | NL   | NL                 | Sportman's hernia | NL  | Surgical open hernia repair or laparoscopic repair with or without adductor release               | NA | NL   | 98%  | 96%  | 6 |
| Cavalli et al. (2014)     | RCS | 80  | 34.7 | NL                 | Sportman's hernia | NL  | Surgical open hernia repair with neurectomy and with or without adductor/rectus abdominis release | NA | NL   | 100% | 100% | 6 |
| Simonet et al. (1995)     | RCS | 10  | 25.5 | Ice hockey         | Sportman's hernia | 9.6 | Surgical open hernia repair                                                                       | NA | NL   | 100% | 100% | 5 |
| Urquhart et al. (1996)    | RCS | 24  | 31.8 | Football           | Groin disruption  | 6   | Surgical open hernia repair                                                                       | NA | 12   | 72%  | 72%  | 5 |
| Susmallian et al. (2004)  | RCS | 35  | 24.3 | Football           | Sportman's hernia | NL  | Surgical open hernia repair                                                                       | NA | 14.6 | 97%  | 97%  | 5 |
| Chernyavsky et al. (2011) | RCS | 96  | 22.6 | Football and Rugby | Athlete's Hernia  | NL  | Surgical muscle repair with neurectomy of the affected nerves                                     | NA | 1.5  | 98%  | 98%  | 4 |
| Preskitt (2011)           | RCS | 100 | NL   | NL                 | Sportman's hernia | NL  | Surgical open hernia repair                                                                       | NA | NL   | 98%  | 98%  | 4 |

### Pubic-related

| Ref                      | Study type | N  | Mean Age (year) | Type of Sports      | Diagnosis                | Mean Duration symptoms (months) | Intervention treatment group | Intervention control group(s) | Mean follow-up (months) | Treatment success (%) | Athletes RTP (%) | D&B Quality score (points) |
|--------------------------|------------|----|-----------------|---------------------|--------------------------|---------------------------------|------------------------------|-------------------------------|-------------------------|-----------------------|------------------|----------------------------|
| McKim and Taunton (2001) | PCS        | 11 | 38.9            | Football            | Osteitis pubis           | 20.6                            | Compression short            | NA                            | 0                       | 33%                   | NL               | 16                         |
| Verrall et al. (2007)    | PCS        | 27 | 23              | Australian Football | Pubic bone stress injury | 4.5                             | Exercise therapy             | NA                            | 24                      | 74%                   | 100%             | 13                         |
| Holt et                  | RCS        | 11 | NL              | NL                  | Osteitis                 | NL                              | Corticosteroid injection     | NA                            | NL                      | 91%                   | NL               | 12                         |

|                          |     |      |      |                     |                   |      |                                                                                  |    |      |      |      |    |
|--------------------------|-----|------|------|---------------------|-------------------|------|----------------------------------------------------------------------------------|----|------|------|------|----|
| al. (1995)               |     |      |      |                     | pubis             |      | symphysis                                                                        |    |      |      |      |    |
| Sansone et al. (2014)    | RCS | 32   | 24   | Football            | Pubalgia          | NL   | Surgical adductor and/or rectus abdominis tenotomy                               | NA | 72   | 75%  | 72%  | 11 |
| Radic and Annear (2008)  | RCS | 23   | 27   | Australian football | Osteitis pubis    | 13.2 | Surgical curettage of the pubic symphysis                                        | NA | 24.3 | 74%  | 70%  | 10 |
| Shaker et al. (1991)     | RCS | 78   | 22   | Football            | Osteitis pubis    | 3    | NSAIDs and physical therapy. Corticosteroid injection pubic bone if non-response | NA | NL   | 75%  | 75%  | 9  |
| de Queiroz et al. (2014) | RCS | 30   | 24.4 | Football            | Pubalgia          | 18.6 | Surgical adductor tenotomy                                                       | NA | 36   | 100% | 100% | 9  |
| O'Connell et al. (2002)  | RCS | 16   | 28.4 | NL                  | Osteitis pubis    | NL   | Corticosteroid injection symphysis                                               | NA | 6    | 69%  | 100% | 6  |
| Fricker et al. (1991)    | RCS | 45   | 30.3 | Running             | Osteitis pubis    | 10.1 | NSAIDs and physical therapy                                                      | NA | 16.5 | 75%  | 49%  | 5  |
| Meyers et al. (2008)     | RCS | 5460 | NL   | Football            | Athletic pubalgia | NL   | Surgical open muscle reattachments and/or releases                               | NA | NL   | 95%  | 95%  | 2  |

### Adductor-related

| Ref                   | Study type | N  | Mean Age (year) | Type of Sports | Diagnosis                                 | Mean Duration symptoms (months) | Intervention treatment group             | Intervention control group(s)  | Mean follow-up (months) | Treatment success (%) | Athletes RTP (%)     | D&B Quality score (points) |
|-----------------------|------------|----|-----------------|----------------|-------------------------------------------|---------------------------------|------------------------------------------|--------------------------------|-------------------------|-----------------------|----------------------|----------------------------|
| Weir et al. (2011)    | RCT        | 48 | 28.1            | Football       | Long-standing adductor-related groin pain | 8                               | Exercise therapy and manual therapy (MM) | Exercise therapy (ET)          | 5                       | MM: 50% ¥<br>ET: 55%  | MM: 50% ¥<br>ET: 55% | 24                         |
| Holmich et al. (1999) | RCT        | 68 | 30              | Football       | Long-standing adductor-related groin      | 9.9                             | Exercise therapy (ET)                    | Standard physical therapy (PT) | 6.5                     | ET: 74% †<br>PT: 30%  | ET: 79% †<br>PT: 14% | 23                         |

|                               |     |     |      |                         |                                                                |      |                                                   |                               |      |                           |                           |    |
|-------------------------------|-----|-----|------|-------------------------|----------------------------------------------------------------|------|---------------------------------------------------|-------------------------------|------|---------------------------|---------------------------|----|
|                               |     |     |      |                         | pain                                                           |      |                                                   |                               |      |                           |                           |    |
| Schilders et al. (2013)       | PCS | 43  | 26.4 | Football                | Long-standing adductor-related groin pain                      | 9.4  | Surgical adductor tenotomy                        | NA                            | 40.2 | 81%                       | 98%                       | 19 |
| Maffulli et al. (2012)        | PCS | 29  | 28   | Football                | Adductor longus tendinopathy                                   | 20   | Surgical bilateral percutaneous adductor tenotomy | NA                            | 36   | 46%                       | 90%                       | 17 |
| Weir et al. (2009)            | RCS | 30  | 20.5 | Football                | Long-standing adductor-related groin pain                      | 9    | Manual therapy technique                          | NA                            | 9    | 84%                       | 90%                       | 16 |
| Schilders et al. (2007)       | PCS | 24  | 27.7 | Football                | Adductor-related groin pain                                    | 4.8  | Corticosteroid injection symphysis                | NA                            | 12   | 33%                       | NL                        | 14 |
| Schilders et al. (2009)       | RCS | 28  | 33.4 | Football                | Adductor longus dysfunction                                    | 17.8 | Corticosteroid injection symphysis                | NA                            | 12   | 68%                       | NL                        | 14 |
| Atkinson et al. (2009)        | PCS | 48  | NL   | Australian football     | Long-standing adductor-related groin pain                      | 16.7 | Surgical percutaneous adductor tenotomy           | NA                            | 36   | 67%                       | 81%                       | 13 |
| Weir et al. (2010)            | RCS | 44  | 27   | Football                | Long-standing adductor-related groin pain                      | NL   | Exercise therapy and passive joint mobilisation   | NA                            | 22   | 71%                       | 77%                       | 13 |
| Robertson et al. (2011)       | RCS | 109 | 25.9 | Gaelic football         | Adductor tendinopathy                                          | 15   | Surgical open adductor tenotomy                   | NA                            | 26   | 72%                       | 92%                       | 11 |
| Schlegel et al. (2009)        | RCS | 19  | 28.5 | Rugby                   | Proximal adductor tendon rupture                               | NL   | Exercise therapy (ET)                             | Surgical adductor repair (SR) | NL   | ET: 100%<br>SR: NA (n<10) | ET: 100%<br>SR: NA (n<10) | 10 |
| Akermark and Johansson (1992) | RCS | 16  | 28.5 | Football and Ice hockey | Chronic groin pain at the origin of the adductor longus muscle | 18.3 | Surgical adductor tenotomy                        | NA                            | 34.8 | 100%                      | 94%                       | 9  |

### Iliopsoas-related

| Ref                        | Study type | N  | Mean Age (year) | Type of Sports | Diagnosis            | Mean Duration symptoms (months) | Intervention treatment group       | Intervention control group(s) | Mean follow-up (months) | Treatment success (%) | Athletes RTP (%) | D&B Quality score (points) |
|----------------------------|------------|----|-----------------|----------------|----------------------|---------------------------------|------------------------------------|-------------------------------|-------------------------|-----------------------|------------------|----------------------------|
| Mozes et al. (1985)        | RCS        | 40 | 24              | Football       | Iliopsoas syndrome   | NL                              | Corticosteroid injection iliopsoas | NA                            | NL                      | 100%                  | 88%              | 12                         |
| Micheli and Solomon (1997) | RCS        | 13 | 17.7            | Dancers        | Iliopsoas tendinitis | NL                              | Corticosteroid injection iliopsoas | NA                            | 13                      | 76%                   | NL               | 6                          |

### Chronic groin pain

| Ref                          | Study type | N   | Mean Age (year) | Type of Sports      | Diagnosis          | Mean Duration symptoms (months) | Intervention treatment group                                                    | Intervention control group(s) | Mean follow-up (months) | Treatment success (%) | Athletes RTP (%) | D&B Quality score (points) |
|------------------------------|------------|-----|-----------------|---------------------|--------------------|---------------------------------|---------------------------------------------------------------------------------|-------------------------------|-------------------------|-----------------------|------------------|----------------------------|
| Mann et al. (2009)           | PCS        | 73  | 30              | Football            | Chronic groin pain | 5                               | Surgical laparoscopic hernia repair                                             | NA                            | NL                      | 73%                   | 99%              | 16                         |
| Jansen et al. (2009)         | PCS        | 21  | 24.8            | Football            | Chronic groin pain | 9.3                             | Exercise therapy                                                                | NA                            | 14                      | 79%                   | NL               | 14                         |
| Kluin et al. (2004)          | RCS        | 14  | 36              | Football            | Chronic groin pain | NL                              | Surgical laparoscopic hernia repair                                             | NA                            | 12                      | 86%                   | 93%              | 12                         |
| Genitsaris et al. (2004)     | RCS        | 131 | 23.5            | Football            | Chronic groin pain | 4.5                             | Surgical laparoscopic hernia repair                                             | NA                            | 60                      | 99%                   | NL               | 8                          |
| Van Der Donckt et al. (2003) | RCS        | 41  | 27              | Football            | Chronic groin pain | 15.2                            | Surgical open hernia repair with adductor release                               | NA                            | 150                     | 98%                   | 100%             | 7                          |
| Polglase et al. (1991)       | RCS        | 63  | 24              | Australian Football | Chronic groin pain | 9.2                             | Surgical open hernia repair with or without division of the ilio-inguinal nerve | NA                            | NL                      | 95%                   | 95%              | 6                          |

### Combined diagnoses

| Ref | Study type | N | Mean Age | Type of Sports | Diagnosis | Mean Duration | Intervention treatment group | Intervention control group(s) | Mean follow-up | Treatment success (%) | Athletes RTP (%) | D&B Quality score (points) |
|-----|------------|---|----------|----------------|-----------|---------------|------------------------------|-------------------------------|----------------|-----------------------|------------------|----------------------------|
|-----|------------|---|----------|----------------|-----------|---------------|------------------------------|-------------------------------|----------------|-----------------------|------------------|----------------------------|

|                         |     |     | (year) |          |                                                         | symptoms<br>(months) |                                                                               |                       | (months) |                      |                      |    |
|-------------------------|-----|-----|--------|----------|---------------------------------------------------------|----------------------|-------------------------------------------------------------------------------|-----------------------|----------|----------------------|----------------------|----|
| Paajanen et al. (2011)  | RCT | 60  | 31     | Football | Sportman's hernia and/or adductor tendinitis            | 12.5                 | Surgical laparoscopic hernia repair with or without an adductor tenotomy (LR) | Exercise therapy (ET) | 12       | LR: 97% +<br>ET: 50% | LR: 97% +<br>ET: 50% | 21 |
| Topol et al. (2005)     | PCS | 24  | 25     | Rugby    | Osteitis pubis and/or adductor tendinopathy             | 15.5                 | Dextrose injections painful sites                                             | NA                    | 17.2     | 85%                  | 92%                  | 16 |
| Mei-Dan et al. (2013)   | RCS | 140 | 23     | Football | Chronic groin pain with or without lower abdominal pain | 5                    | Surgical adductor tenotomy with or without laparoscopic hernia repair         | NA                    | NL       | 80%                  | NL                   | 12 |
| Biedert et al. (2003)   | RCS | 24  | 25.8   | Football | Chronic symphysis syndrome                              | 17                   | Surgical rectus abdominis and/or adductor tenotomy                            | NA                    | 79.2     | 85%                  | 96%                  | 11 |
| Topol and Reeves (2008) | PCS | 72  | NL     | Rugby    | Chronic groin/abdominal pain                            | 11                   | Dextrose injections adductors                                                 | NA                    | 26       | 80%                  | 92%                  | 11 |
| Meyers et al. (2000)    | RCS | 157 | NL     | Football | Lower abdominal pain syndrome or inguinal pain          | 14.4                 | Surgical reattachment rectus abdominis with or without adductor release       | NA                    | 46.8     | 95%                  | 95%                  | 9  |
| Martens et al. (1987)   | RCS | 81  | 26.3   | Football | Adductor tendinitis and/or                              | 10                   | Surgical adductor and/or rectus abdominis tenotomy                            | NA                    | 24       | 88%                  | NL                   | 8  |

|                          |     |    |      |            |                                               |    |                                                                                  |                                                             |     |                      |                  |   |
|--------------------------|-----|----|------|------------|-----------------------------------------------|----|----------------------------------------------------------------------------------|-------------------------------------------------------------|-----|----------------------|------------------|---|
|                          |     |    |      |            | rectus abdominis tendopathy                   |    |                                                                                  |                                                             |     |                      |                  |   |
| Dojcinovic et al. (2012) | PCS | 99 | 23.9 | Football   | Sportsman's hernia and/or adductor tendinosis | NL | Surgical open hernia repair with neurectomy and with or without adductor release | NA                                                          | 12  | 96%                  | 97%              | 7 |
| Brown et al. (2008)      | RCS | 98 | 27.1 | Ice hockey | Intractable lower abdominal and groin pain    | NL | Surgical external oblique repair with neurectomy of the ilio-inguinal nerve      | NA                                                          | NL  | 99%                  | 99%              | 4 |
| Garvey and Hazard (2013) | CCT | 66 | 33   | NL         | Multiple diagnoses related to groin pain      | NL | Surgical treatment (various) (ST)                                                | Standard physical therapy and corticosteroid injection (PT) | 156 | ST: 94% ¥<br>PT: 93% | ST: NL<br>PT: NL | 2 |

RCT = Randomised Controlled Trial, PCS = Prospective Case Series, RCS = Retrospective Case Series, N = Number, NA = Not Applicable, NL = Not Listed. † = significant improvement in favour of treatment group, ¥ = no significant difference in outcome between treatment groups
