# Supplementary material for: Study quality on groin injury management remains low: a systematic review on treatment of groin pain in athletes
Source: HighWire-hosted journal article supplement (doi:10.1136/bjsports-2014-094256), 2015-01-29
Supplement: bjsports-2014-094256supp_table1.pdf [file bjsports-2014-094256supp_table1.pdf]

**Supplementary table 1 - Search strategy**

|                  |             |             |
|------------------|-------------|-------------|
| Embase.com       | 1289        | 1276        |
| Medline (ovidSP) | 838         | 173         |
| Web-of-science   | 726         | 215         |
| Scopus           | 1317        | 195         |
| CINAHL           | 436         | 122         |
| PubMed publisher | 46          | 25          |
| Cochrane         | 20          | 1           |
| Google Scholar   | 200         | 52          |
| Sportdiscus      | 508         | 157         |
| <b>Total</b>     | <b>5380</b> | <b>2216</b> |

**Duplicates removed:** 3164

**Embase.com - 1289**

('inguinal pain'/de OR ((pain/exp OR injury/exp OR tendinitis/de OR osteitis/de OR 'tendon injury'/exp OR 'muscle strain'/exp OR 'cumulative trauma disorder'/de) AND ('inguinal region'/exp OR 'inguinal hernia'/de OR 'pubis symphysis'/de OR 'iliopsoas muscle'/de OR 'rectus abdominis muscle'/de OR 'abdominal wall'/exp OR 'pubic bone'/de)) OR (((Athlet\* OR Incipient OR sport\* OR hockey OR soccer\* OR footbal\* OR rugby) NEAR/3 (Pubalgia\* OR herni\* OR groin\*)) OR ((gilmore\* OR disrupt\* OR pain OR injur\* OR pain\* OR symphysit\* OR tendinit\* OR tendonit\* OR tendinopat\* OR tendinos\* OR tenonit\* OR tenontit\* OR tenosit\* OR rupture\* OR Osteit\* OR avuls\* OR fracture\* OR tear\*) NEAR/6 (groin\* OR inguin\* OR pubic OR pubis OR iliopsoa\* OR psoas\* OR adductor\* OR pubi\* OR 'rectus abdominis' OR 'abdominal rectus' OR 'rectus abdominal' OR 'abdominal wall'))):ab,ti) AND (athlete/de OR sport/exp OR 'sport injury'/exp OR 'sports medicine'/de OR (athlet\* OR sport\* OR football\* OR soccer\* OR rugb\* OR hockey\* OR cycli\* OR runner\* OR running\* OR basketball\* OR baseball\* OR cricket\* OR tennis\* OR racquet\*):ab,ti)

**Medline (ovidSP) - 838**

((exp pain/ OR exp "Wounds and Injuries"/ OR injuries.xs. OR osteitis/ ) AND ("groin"/ OR "Inguinal Canal"/ OR "Hernia, Inguinal"/ OR "Pubic Symphysis"/ OR "Rectus Abdominis"/ OR "Abdominal Wall"/ OR "Pubic Bone"/)) OR (((Athlet\* OR Incipient OR sport\* OR hockey OR soccer\* OR footbal\* OR rugby) ADJ3 (Pubalgia\* OR herni\* OR groin\*)) OR ((gilmore\* OR disrupt\* OR pain OR injur\* OR

pain\* OR symphysit\* OR tendinit\* OR tendonit\* OR tendinopat\* OR tendinos\* OR tenonit\* OR tenontit\* OR tenosit\* OR rupture\* OR Osteit\* OR avuls\* OR fracture\* OR tear\*) ADJ6 (groin\* OR inguin\* OR pubic OR pubis OR iliopsoa\* OR psoas\* OR adductor\* OR pubi\* OR "rectus abdominis" OR "abdominal rectus" OR "rectus abdominal" OR "abdominal wall"))).ab,ti.) AND (athletes/ OR exp sports/ OR exp "Athletic Injuries"/ OR "sports medicine"/ OR (athlet\* OR sport\* OR football\* OR soccer\* OR rugb\* OR hockey\* OR cycli\* OR runner\* OR running\* OR basketball\* OR baseball\* OR cricket\* OR tennis\* OR racquet\*).ab,ti.)

### **Web-of-science - 726**

TS((((Athlet\* OR Incipient OR sport\* OR hockey OR soccer\* OR footbal\* OR rugby) NEAR/3 (Pubalgia\* OR herni\* OR groin\*)) OR ((gilmore\* OR disrupt\* OR pain OR injur\* OR pain\* OR symphysit\* OR tendinit\* OR tendonit\* OR tendinopat\* OR tendinos\* OR tenonit\* OR tenontit\* OR tenosit\* OR rupture\* OR Osteit\* OR avuls\* OR fracture\* OR tear\*) NEAR/6 (groin\* OR inguin\* OR pubic OR pubis OR iliopsoa\* OR psoas\* OR adductor\* OR pubi\* OR "rectus abdominis" OR "abdominal rectus" OR "rectus abdominal" OR "abdominal wall")))) AND ((athlet\* OR sport\* OR football\* OR soccer\* OR rugb\* OR hockey\* OR cycli\* OR runner\* OR running\* OR basketball\* OR baseball\* OR cricket\* OR tennis\* OR racquet\*))

### **Scopus - 1317**

TITLE-ABS-KEY((((Athlet\* OR Incipient OR sport\* OR hockey OR soccer\* OR footbal\* OR rugby) W/3 (Pubalgia\* OR herni\* OR groin\*)) OR ((gilmore\* OR disrupt\* OR pain OR injur\* OR pain\* OR symphysit\* OR tendinit\* OR tendonit\* OR tendinopat\* OR tendinos\* OR tenonit\* OR tenontit\* OR tenosit\* OR rupture\* OR Osteit\* OR avuls\* OR fracture\* OR tear\*) W/6 (groin\* OR inguin\* OR pubic OR pubis OR iliopsoa\* OR psoas\* OR adductor\* OR pubi\* OR "rectus abdominis" OR "abdominal rectus" OR "rectus abdominal" OR "abdominal wall")))) AND ((athlet\* OR sport\* OR football\* OR soccer\* OR rugb\* OR hockey\* OR cycli\* OR runner\* OR running\* OR basketball\* OR baseball\* OR cricket\* OR tennis\* OR racquet\*))

### **CINAHL - 436**

(MH "Groin Pain" OR MH "Sports Hernia" OR ((MH pain+ OR MH "Wounds and Injuries+" OR MH osteitis+ ) AND (MH "groin+" OR MH "Hernia, Inguinal+" OR MH "Pubic Symphysis+" OR MH "Rectus Abdominis Muscles+" OR MH "Pubic Bone+")) OR (((Athlet\* OR Incipient OR sport\* OR hockey OR soccer\* OR footbal\* OR rugby) N3 (Pubalgia\* OR herni\* OR groin\*)) OR ((gilmore\* OR disrupt\* OR pain OR injur\* OR pain\* OR symphysit\* OR tendinit\* OR tendonit\* OR tendinopat\* OR tendinos\* OR tenonit\* OR tenontit\* OR tenosit\* OR rupture\* OR Osteit\* OR avuls\* OR fracture\* OR tear\*) N6 (groin\* OR inguin\* OR pubic OR pubis OR iliopsoa\* OR psoas\* OR adductor\* OR pubi\* OR "rectus abdominis" OR "abdominal rectus" OR "rectus abdominal" OR "abdominal wall")))) AND (MH athletes+ OR MH sports+ OR MH "Athletic Injuries+" OR MH "sports medicine+" OR (athlet\* OR

sport\* OR football\* OR soccer\* OR rugb\* OR hockey\* OR cycli\* OR runner\* OR running\* OR basketball\* OR baseball\* OR cricket\* OR tennis\* OR racquet\*)

#### PubMed publisher - 46

(((((Athlet\*[tiab] OR Incipient[tiab] OR sport\*[tiab] OR hockey[tiab] OR soccer\*[tiab] OR footbal\*[tiab] OR rugby) AND (Pubalgia\*[tiab] OR herni\*[tiab] OR groin\*[tiab])) OR ((gilmore\*[tiab] OR disrupt\*[tiab] OR pain[tiab] OR injur\*[tiab] OR pain\*[tiab] OR symphysit\*[tiab] OR tendinit\*[tiab] OR tendonit\*[tiab] OR tendinopat\*[tiab] OR tendinos\*[tiab] OR tenonit\*[tiab] OR tenontit\*[tiab] OR tenosit\*[tiab] OR rupture\*[tiab] OR Osteit\*[tiab] OR avuls\*[tiab] OR fracture\*[tiab] OR tear\*[tiab]) AND (groin\*[tiab] OR inguin\*[tiab] OR pubic OR pubis OR iliopsoa\*[tiab] OR psoas\*[tiab] OR adductor\*[tiab] OR pubi\*[tiab] OR rectus abdominis\*[tiab] OR abdominal rectus\*[tiab] OR rectus abdominal\*[tiab] OR abdominal wall\*[tiab]))) AND ((athlet\*[tiab] OR sport\*[tiab] OR football\*[tiab] OR soccer\*[tiab] OR rugb\*[tiab] OR hockey\*[tiab] OR cycli\*[tiab] OR runner\*[tiab] OR running\*[tiab] OR basketball\*[tiab] OR baseball\*[tiab] OR cricket\*[tiab] OR tennis\*[tiab] OR racquet\*[tiab])) AND publisher[sb]

#### Cochrane - 20

((((Athlet\* OR Incipient OR sport\* OR hockey OR soccer\* OR footbal\* OR rugby) NEAR/3 (Pubalgia\* OR herni\* OR groin\*)) OR ((gilmore\* OR disrupt\* OR pain OR injur\* OR pain\* OR symphysit\* OR tendinit\* OR tendonit\* OR tendinopat\* OR tendinos\* OR tenonit\* OR tenontit\* OR tenosit\* OR rupture\* OR Osteit\* OR avuls\* OR fracture\* OR tear\*) NEAR/6 (groin\* OR inguin\* OR pubic OR pubis OR iliopsoa\* OR psoas\* OR adductor\* OR pubi\* OR 'rectus abdominis' OR 'abdominal rectus' OR 'rectus abdominal' OR 'abdominal wall'))):ab,ti) AND ((athlet\* OR sport\* OR football\* OR soccer\* OR rugb\* OR hockey\* OR cycli\* OR runner\* OR running\* OR basketball\* OR baseball\* OR cricket\* OR tennis\* OR racquet\*):ab,ti)

#### Google Scholar - 200

pain | injury | tendinitis | tendinopathy | osteitis | strain | trauma inguinal | "pubis symphysis" | iliopsoas | "rectus abdominis" | "abdominal wall" | "pubic bone " | groin Athlete | Athletes | Incipient | sport | sportsmen | hockey | soccer | football | soccer | rugby | basketball | base ball

#### Sportdiscus - 508

(MH "Groin Pain" OR MH "Sports Hernia" OR ((MH pain+ OR MH "WOUNDS & injuries+" OR MH osteitis+ ) AND (MH "groin+" OR MH "Rectus Abdominis Muscles+" OR MH "Pubic Bone+")) OR (((Athlet\* OR Incipient OR sport\* OR hockey OR soccer\* OR footbal\* OR rugby) N3 (Pubalgia\* OR herni\* OR groin\*)) OR ((gilmore\* OR disrupt\* OR pain OR injur\* OR pain\* OR symphysit\* OR

tendinit\* OR tendonit\* OR tendinopat\* OR tendinos\* OR tenonit\* OR tenontit\* OR tenosit\* OR rupture\* OR Osteit\* OR avuls\* OR fracture\* OR tear\*) N6 (groin\* OR inguin\* OR pubic OR pubis OR iliopsoa\* OR psoas\* OR adductor\* OR pubi\* OR "rectus abdominis" OR "abdominal rectus" OR "rectus abdominal" OR "abdominal wall")))) AND (MH athletes+ OR MH sports+ OR MH "sports Injuries+" OR MH "sports medicine+" OR (athlet\* OR sport\* OR football\* OR soccer\* OR rugb\* OR hockey\* OR cycli\* OR runner\* OR running\* OR basketball\* OR baseball\* OR cricket\* OR tennis\* OR racquet\*))
